# Supplementary material for: A spherosilicate oligomer with eight stable silanol groups as a building block of hybrid materials
Source: Royal Society of Chemistry journal article supplement (doi:10.1039/c2nj20953e), 2012-01-01
Supplement: c2nj20953e.pdf [file c2nj20953e.pdf]

## Electronic Supplementary Information

### Spherosilicate oligomer with eight stable silanol groups as a building unit of hybrid materials

**Kazufumi Kawahara,<sup>a</sup> Hiroki Tachibana,<sup>a</sup> Yoshiaki Hagiwara<sup>a</sup>, and Kazuyuki Kuroda<sup>\*a,b</sup>**

[a] K. Kawahara, H. Tachibana, Dr. Y. Hagiwara and Prof. K. Kuroda  
Department of Applied Chemistry  
Faculty of Science and Engineering, Waseda University,  
Ohkubo3-4-1, Shinjuku-ku, Tokyo, 169-8555, Japan.  
Fax: +81 3 5286 3199; Tel: +81 3 5286 3199  
E-mail: kuroda@waseda.jp

[b] Prof. K. Kuroda  
Kagami Memorial Research Institute for Materials Science and Technology  
Waseda University,  
Nishiwaseda2-8-26, Shinjuku-ku, Tokyo, 169-0051, Japan.

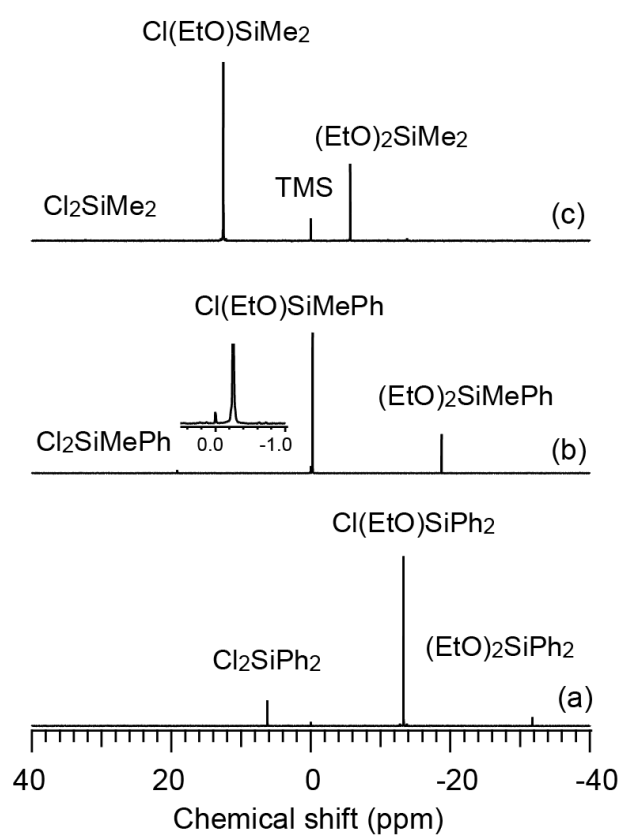

Fig. S1  $^{29}\text{Si}$  NMR spectra of silylation agents a)  $\text{Cl}(\text{EtO})\text{SiPh}_2$ , b)  $\text{Cl}(\text{EtO})\text{SiMePh}$ , and c)  $\text{Cl}(\text{EtO})\text{SiMe}_2$  (in  $\text{CDCl}_3$ ).

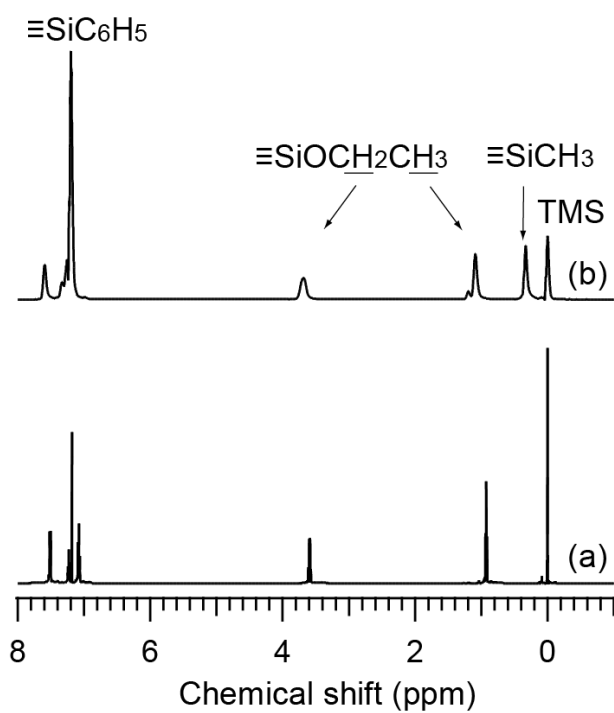

Fig. S2 <sup>1</sup>H NMR spectra of a) **PP(OEt)-D4R** and b) **MP(OEt)-D4R** (in CDCl<sub>3</sub>).

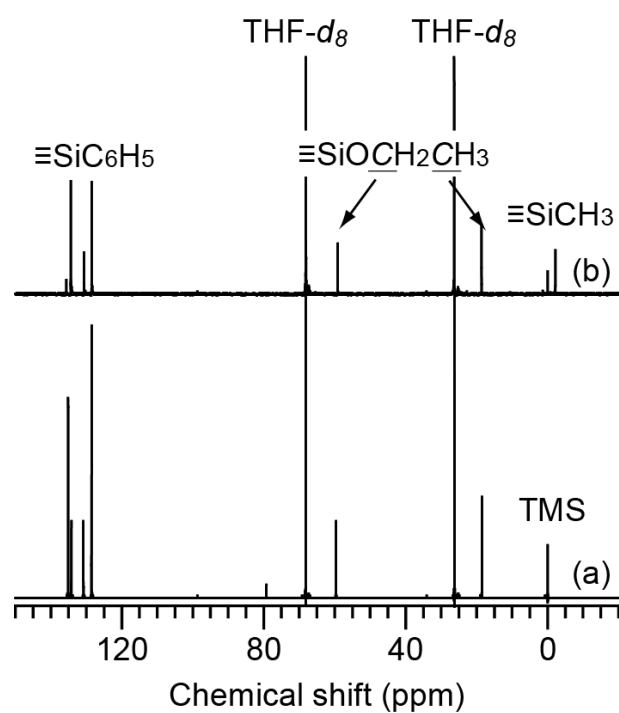

Fig. S3  $^{13}\text{C}$  NMR spectra of a) **PP(OEt)-D4R** and b) **MP(OEt)-D4R** (in  $\text{THF-}d_8$ ).

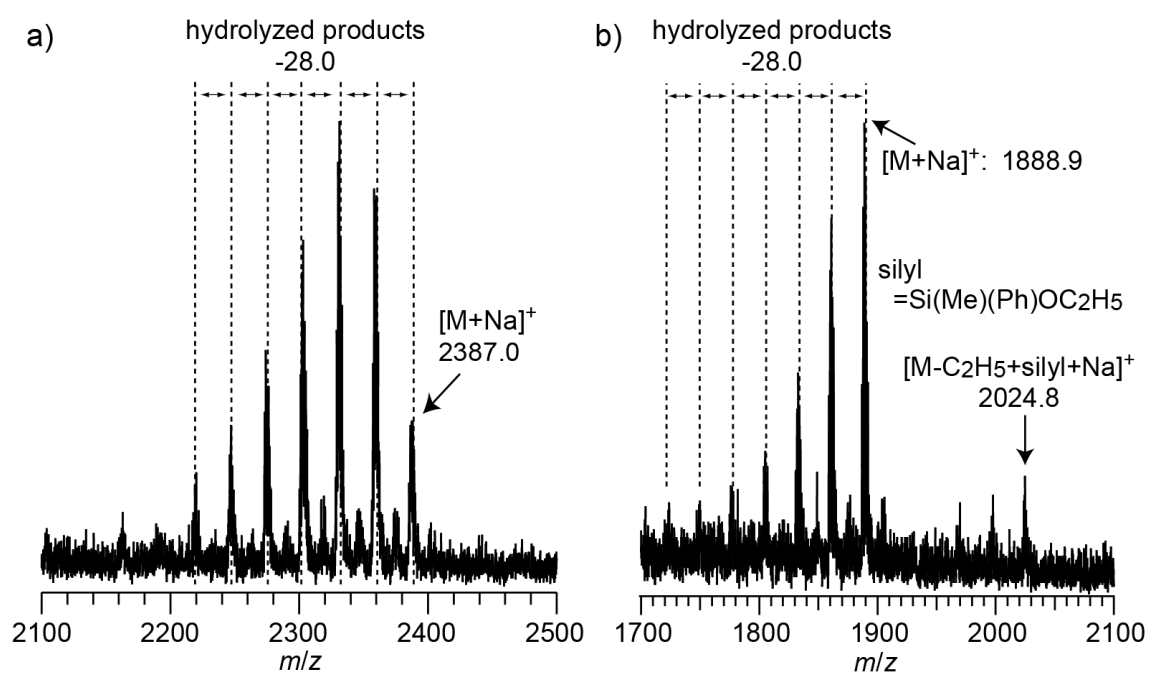

Fig. S4 MALDI-TOF mass spectra of a) **PP(OEt)-D4R** and b) **MP(OEt)-D4R**.

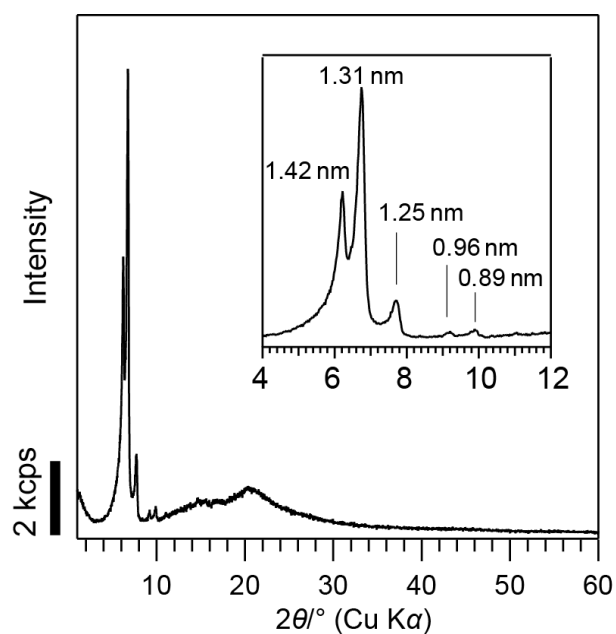

Fig. S5 XRD pattern of a cast film of **PP(OEt)-D4R** on a glass substrate.

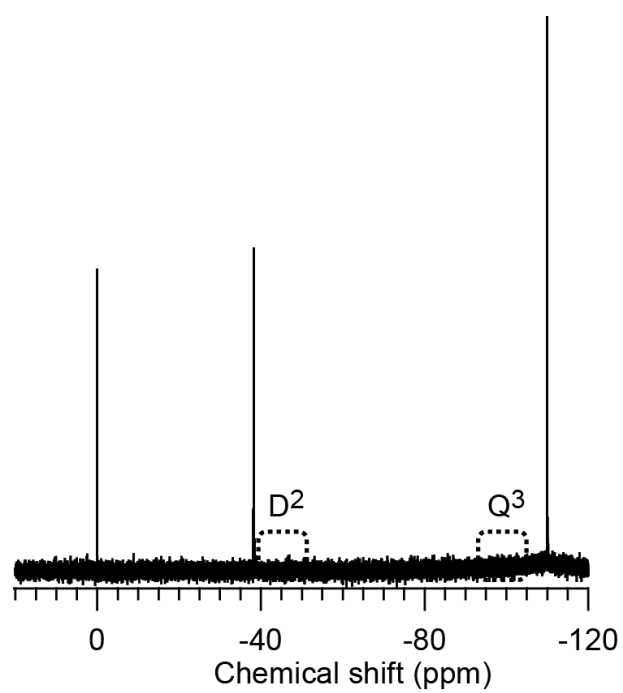

Fig. S6  $^{29}\text{Si}$  NMR spectrum of **PP(OH)-D4R** (in THF-*d*8) (overall view of Fig. 3).

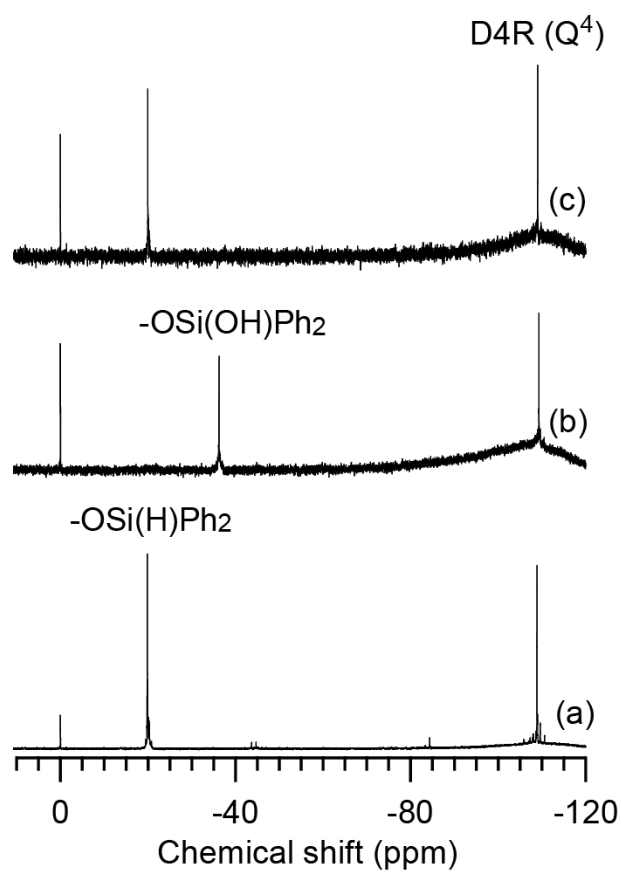

Fig. S7  $^{29}\text{Si}$  NMR spectra of a) **PP(H)-D4R**, b) oxidized product by  $\text{Pd}(\text{OH})_2/\text{C}$ , and c) oxidized product by  $\text{Pd}/\text{C}$  (in  $\text{CDCl}_3$ ).



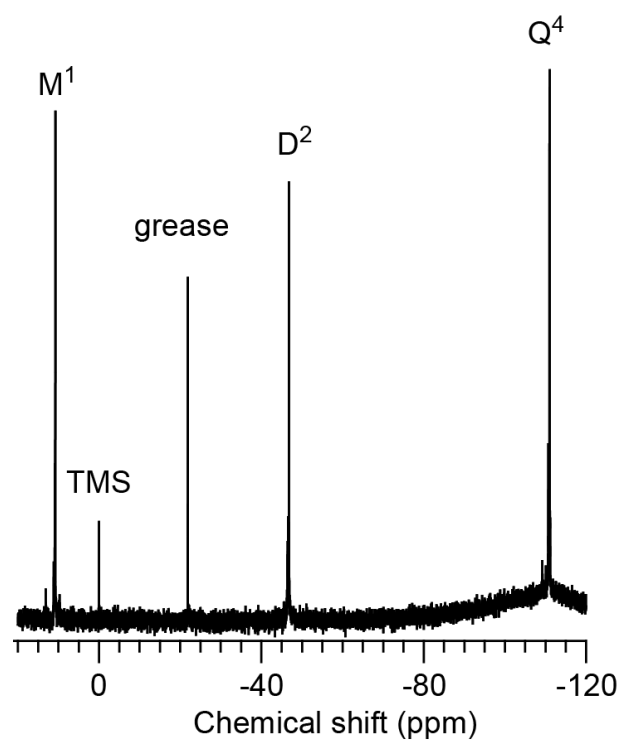

Fig. S8  $^{29}\text{Si}$  NMR spectrum of trimethylsilylated **PP(OH)-D4R** (in  $\text{CDCl}_3$ ).

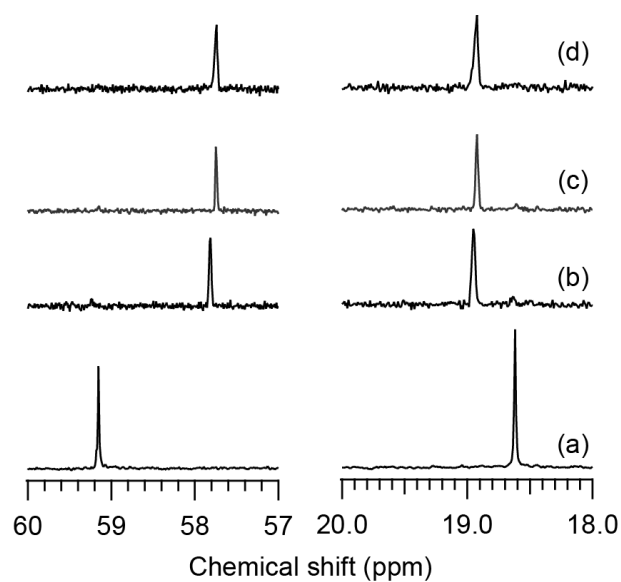

Fig. S9 <sup>13</sup>C NMR spectra of a) **MP(OEt)-D4R**, hydrolysis of **MP(OEt)-D4R** after b) 1 h, c) 3 h, and d) 1 d (in THF-*d*8).

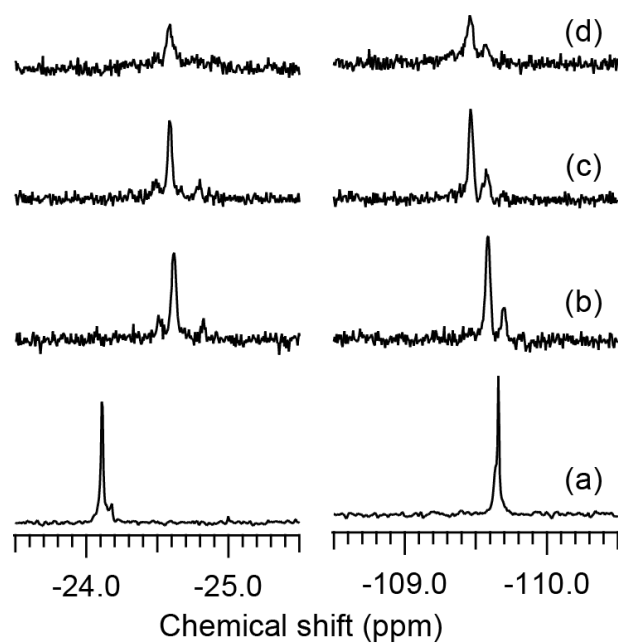

Fig. S10  $^{29}\text{Si}$  NMR spectra of a) **MP(OEt)-D4R**, hydrolysis of **MP(OEt)-D4R** after b) 1 h, c) 3 h, and d) 1 d (in THF-*d*8).

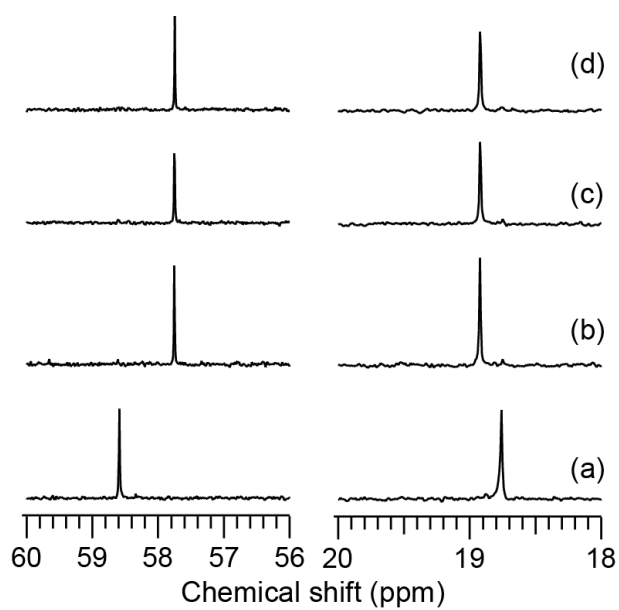

Fig. S11  $^{13}\text{C}$  NMR spectra of a) **MM(OEt)-D4R**, hydrolysis of **MM(OEt)-D4R** after b) 0.5 h, c) 1 h, and d) 3 h (in THF- $d_8$ ).

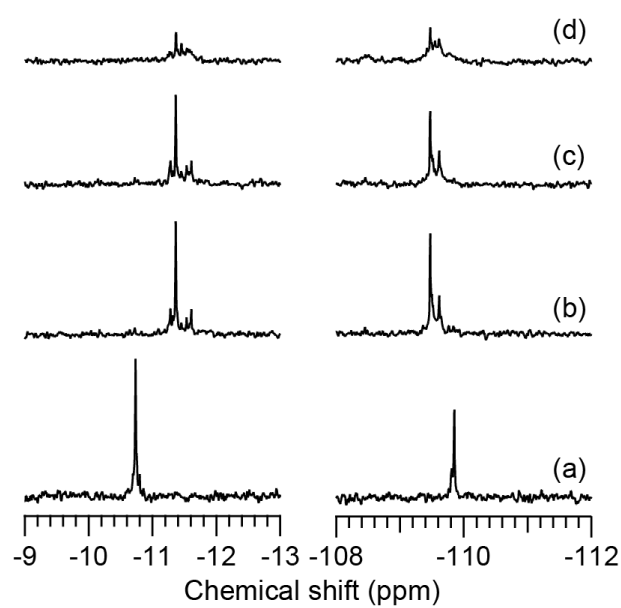

Fig. S12  $^{29}\text{Si}$  NMR spectra of a) **MM(OEt)-D4R**, hydrolysis of **MM(OEt)-D4R** after  
b) 0.5 h, c) 1 h, and d) 3 h (in THF-*d*8).

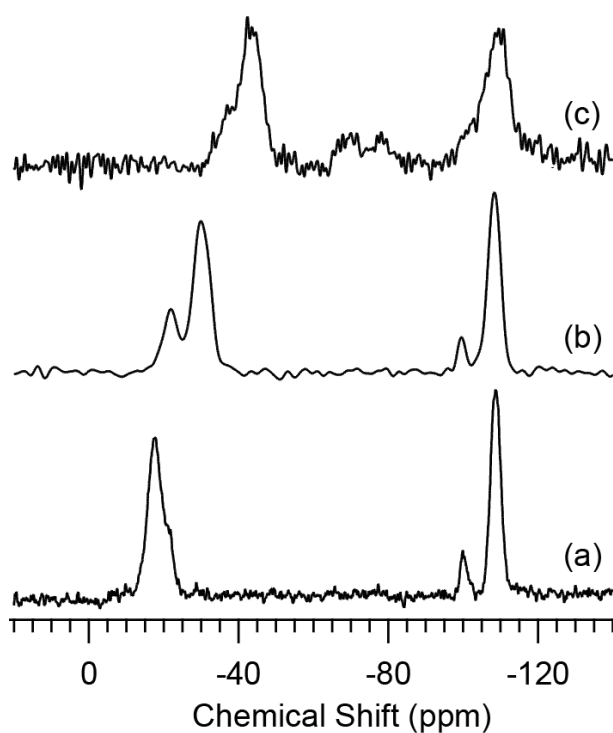

Fig. S13  $^{29}\text{Si}$  MAS NMR spectra of a) **MM-D4R-G**, b) **MP-D4R-G**, and c) **PP(OH)-D4R** heat-treated at 180 °C for 8 d (reprinted from Fig. 7d).

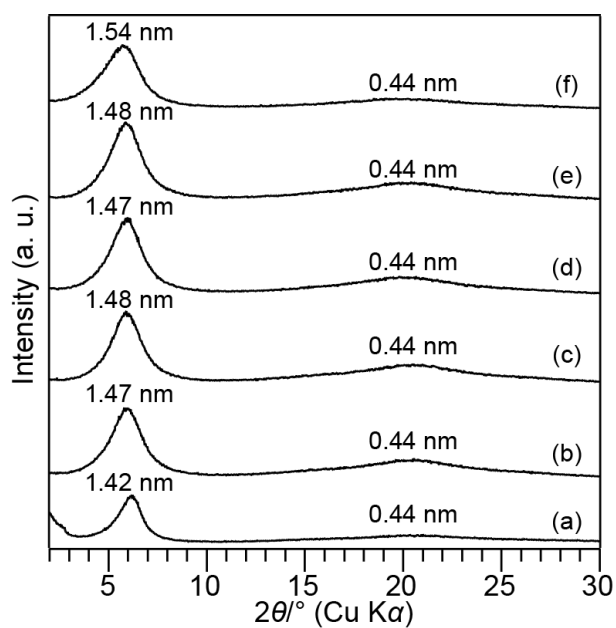

Fig. S14 XRD patterns of a) **PP(OH)-D4R** and heat-treated samples b) 120 °C, 4 d, c) 120 °C, 8 d, d) 180 °C, 4 d, e) 180 °C, 8 d, and f) 300 °C, 2 d.

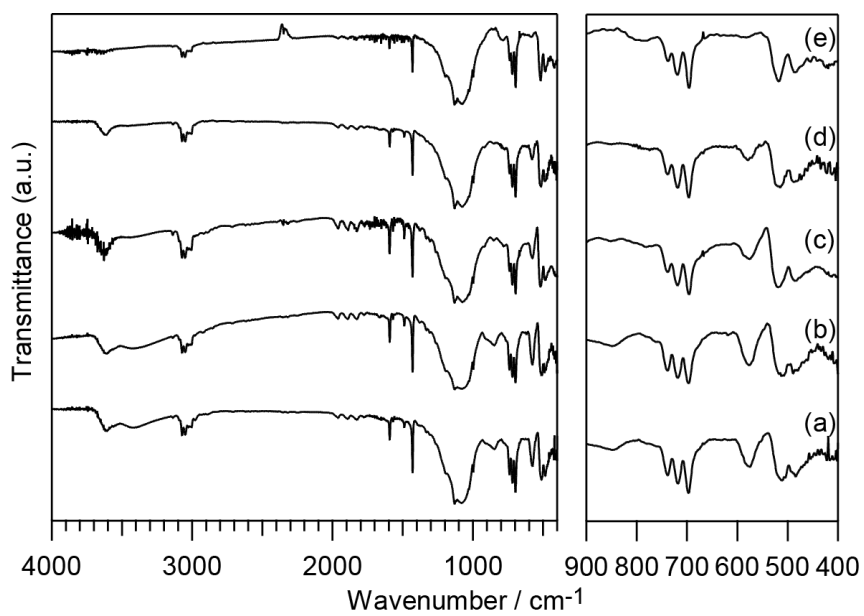

Fig. S15 IR spectra of heat-treated samples a) 120 °C, 4 d, b) 120 °C, 8 d, c) 180 °C, 4 d, d) 180 °C, 8 d, and e) 300 °C, 2 d.



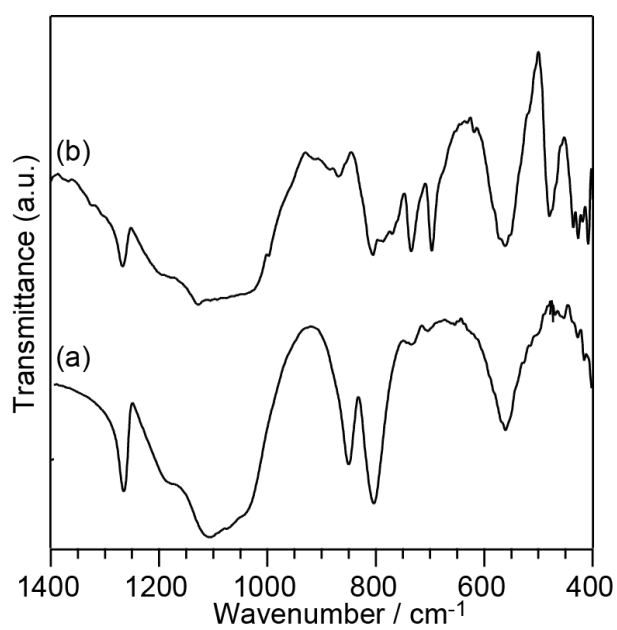

Fig. S16 IR spectra of a) **MM-D4R-G** and b) **MP-D4R-G**.

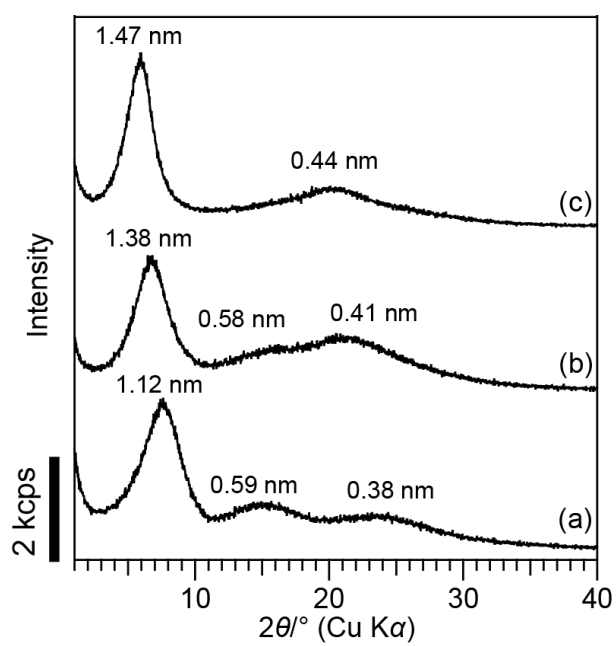

Fig. S17 XRD patterns of a) **MM-D4R-G**, b) **MP-D4R-G**, and c) heat-treated **PP(OH)-D4R** at 180 °C for 8 d (reprinted from Fig. S14e, ESI†).

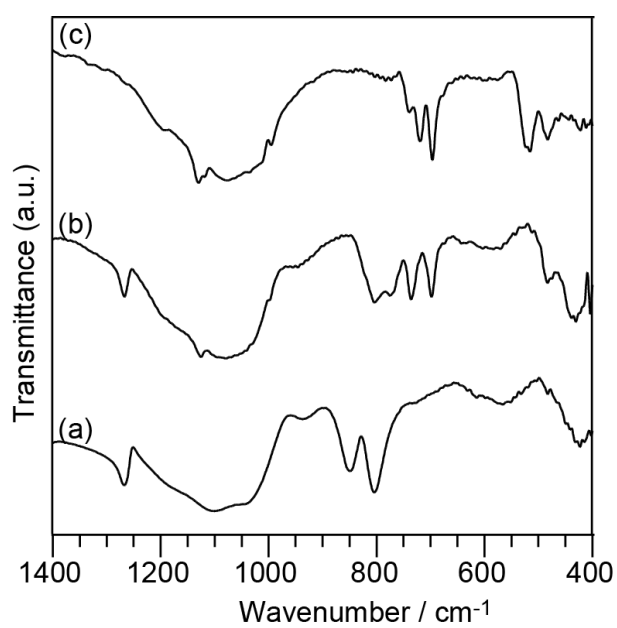

Fig. S18 FT-IR spectra of a) **MM-G**, b) **MP-G**, and c) **PP-G-heat**.

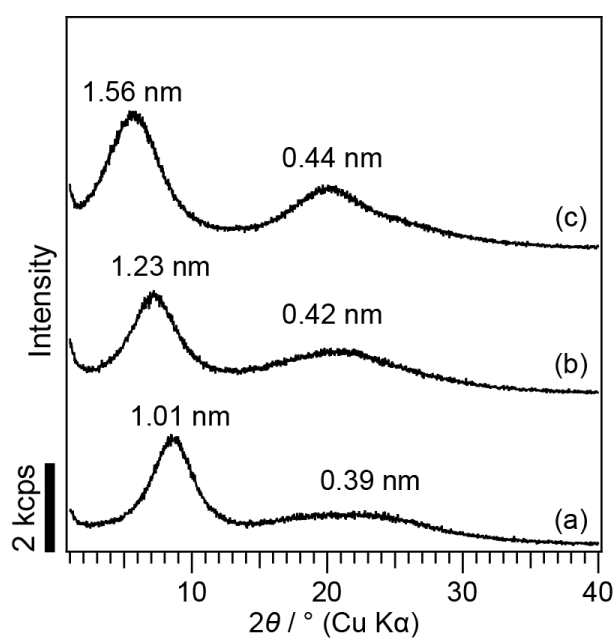

Fig. S19 XRD patterns of a) **MM-G**, b) **MP-G**, and c) **PP-G-heat**.

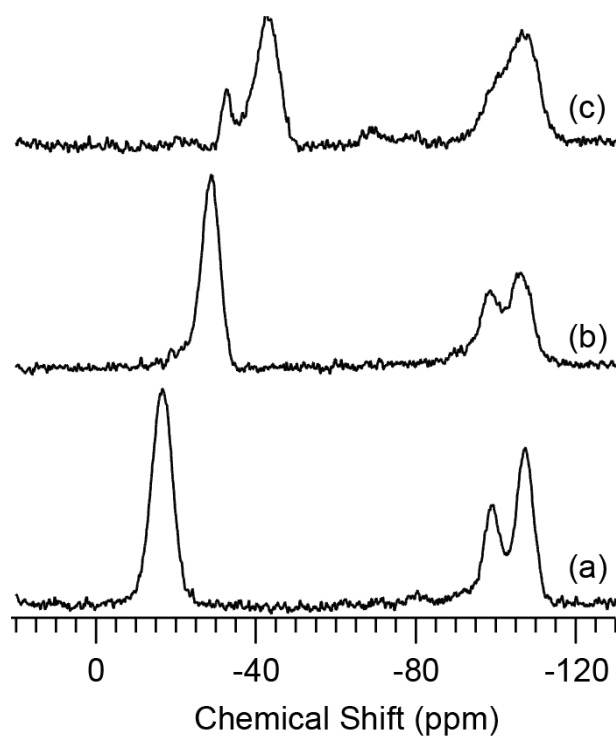

Fig. S20 Solid-state  $^{29}\text{Si}$  NMR spectra of a) **MM-G**, b) **MP-G**, and c) **PP-G-heat**.
